# Supplementary material for: Improving Model Performance on the Stratification of Breast Cancer Patients by Integrating Multiscale Genomic Features
Source: Biomed Res Int. 2020 Aug 25;2020:1475368. doi: 10.1155/2020/1475368 (PMC7471833; doi:10.1155/2020/1475368)
Supplement: Supplementary 6 — Supplementary Table 2. Three metrics for the independent test set by using mRNAs, microRNAs and the combination of mRNAs and microRNAs as features in KIRC. [file 1475368.f6.xlsx]

## Sheet: MCC
KIRC_total	mRNA	miRNA	mRNA+miRNA
	0.4536	0.4951	0.4997
	0.4528	0.4012	0.4778
	0.3621	0.3987	0.5195
	0.4281	0.4734	0.4816
	0.4492	0.4183	0.4759
	0.4655	0.3697	0.5033
	0.5276	0.3766	0.4433
	0.4089	0.5182	0.4291
	0.5343	0.3924	0.4956
	0.5105	0.3732	0.5563
KIRC_SHAP	mRNA	miRNA	mRNA+miRNA
	0.5095	0.4498	0.5047
	0.4381	0.5192	0.4792
	0.513	0.4504	0.53
	0.4204	0.4691	0.5375
	0.4589	0.5382	0.5113
	0.4046	0.4799	0.4708
	0.5435	0.4455	0.5494
	0.4955	0.5007	0.4972
	0.4492	0.4218	0.5165
	0.497	0.4889	0.519

## Sheet: ACC
KIRC_total	mRNA	miRNA	mRNA+miRNA
	0.7353	0.7647	0.7549
	0.7255	0.7255	0.7451
	0.7255	0.7157	0.7549
	0.7255	0.7549	0.7353
	0.7353	0.7255	0.7451
	0.7451	0.6863	0.7745
	0.7745	0.6863	0.7353
	0.7353	0.7843	0.7451
	0.7647	0.7157	0.7647
	0.7353	0.7059	0.7941
KIRC_SHAP	mRNA	miRNA	mRNA+miRNA
	0.7451	0.7549	0.7745
	0.7353	0.7745	0.7451
	0.7647	0.7255	0.7549
	0.7451	0.7255	0.7745
	0.7451	0.7745	0.7549
	0.7157	0.7647	0.7549
	0.7549	0.7157	0.7843
	0.7745	0.7549	0.7549
	0.7353	0.7255	0.7745
	0.7647	0.7647	0.7843

## Sheet: F1
KIRC_total	mRNA	miRNA	mRNA+miRNA
	0.6197	0.6571	0.6988
	0.6316	0.6	0.6286
	0.5484	0.6234	0.6835
	0.6316	0.6479	0.6667
	0.6494	0.6316	0.6667
	0.6389	0.6	0.6567
	0.6349	0.5789	0.6301
	0.6087	0.6452	0.6176
	0.6757	0.5915	0.6667
	0.6824	0.6053	0.7123
KIRC_SHAP	mRNA	miRNA	mRNA+miRNA
	0.6829	0.6154	0.6761
	0.6494	0.6933	0.6905
	0.6842	0.6585	0.6835
	0.6061	0.641	0.7294
	0.6486	0.6849	0.7253
	0.6329	0.625	0.6575
	0.7126	0.5915	0.7105
	0.6462	0.6914	0.7059
	0.6494	0.6111	0.6933
	0.6757	0.6571	0.6667
