# Supplementary material for: Improving Model Performance on the Stratification of Breast Cancer Patients by Integrating Multiscale Genomic Features
Source: Biomed Res Int. 2020 Aug 25;2020:1475368. doi: 10.1155/2020/1475368 (PMC7471833; doi:10.1155/2020/1475368)
Supplement: Supplementary 11 — Supplementary Table 7. The MCCs achieved by different machine learning algorithms combined with different feature selection methods in BRCA. [file 1475368.f11.xlsx]

## Sheet: 30
30 features
mRNA		Feature Selection							miRNA		Feature Selection
		GainRatio	InfoGain	OneR	ReliefF	Fold Change	Mean MCC				GainRatio	InfoGain	OneR	ReliefF	Fold Change	Mean MCC
Ensemble Method	AdaBoostM1	0.7892	0.7892	0.7892	0.7334	0.7892	0.77804		Ensemble Method	AdaBoostM1	0.4473	0.6644	0.7702	0.6931	0.7246	0.65992
	Dagging	0.7764	0.7739	0.8151	0.7558	0.8044	0.78512			Dagging	0.6447	0.7418	0.7112	0.6481	0.6801	0.68518
	LogitBoost	0.8151	0.772	0.8159	0.8003	0.8159	0.80384			LogitBoost	0.666	0.6958	0.7087	0.6781	0.755	0.70072
	RandomCommittee	0.8159	0.8044	0.7872	0.761	0.7892	0.79154			RandomCommittee	0.7412	0.801	0.7401	0.7328	0.7567	0.75436
	RandomForest	0.8003	0.8174	0.8308	0.772	0.8159	0.80728			RandomForest	0.7705	0.8151	0.8003	0.7718	0.8003	0.7916
	RotationForest	0.8298	0.8044	0.8308	0.7872	0.8159	0.81362			RotationForest	0.7555	0.7401	0.7705	0.7274	0.7555	0.7498
	MultiClassClassifier	0.7855	0.7949	0.8044	0.7274	0.7853	0.7795			MultiClassClassifier	0.6938	0.6931	0.6931	0.6456	0.7243	0.68998
	RandomSubSpace	0.7855	0.8159	0.8447	0.8151	0.8024	0.81272			RandomSubSpace	0.7249	0.7718	0.8013	0.7402	0.7718	0.762
	Decorate	0.8151	0.801	0.6982	0.8044	0.7567	0.77508			Decorate	0.7401	0.7274	0.7246	0.7707	0.7707	0.7467
	MultiBoostAB	0.7892	0.7892	0.7892	0.787	0.7892	0.78876			MultiBoostAB	0.5932	0.7243	0.7243	0.5932	0.661	0.6592
	Mean MCC	0.8002	0.79623	0.80055	0.77436	0.79641				Mean MCC	0.67772	0.73748	0.74443	0.7001	0.74
Single Classifier	SimpleLogistic	0.7555	0.7764	0.8024	0.8024	0.7859	0.78452		Single Classifier	SimpleLogistic	0.7112	0.7397	0.7249	0.6447	0.7246	0.70902
	NaiveBayes	0.6938	0.6763	0.6818	0.6205	0.7121	0.6769			NaiveBayes	0.5857	0.6781	0.7243	0.4039	0.7117	0.62074
	LibSVM	0.6416	0.761	0.7764	0.6689	0.6689	0.70336			LibSVM	0.6692	0.5773	0.5153	0.175	0.5825	0.50386
	LocalKnn	0.5772	0.8044	0.8044	0.7249	0.6456	0.7113			LocalKnn	0.4859	0.6458	0.6153	0.3609	0.7702	0.57562
	LibLINEAR	0.5611	0.4892	0.5439	0.1594	0.6497	0.48066			LibLINEAR	0.6591	0.6251	0.6529	0.0538	0.4298	0.48414
	HoeffdingTree	0.6938	0.6763	0.6818	0.7402	0.7121	0.70084			HoeffdingTree	0.5894	0.6781	0.7089	0.4039	0.7117	0.6184
	DecisionTable	0.7859	0.7872	0.8159	0.7585	0.8151	0.79252			DecisionTable	0.7099	0.717	0.717	0.6526	0.717	0.7027
	CSForest	0.7249	0.7094	0.7094	0.7594	0.6938	0.71938			CSForest	0.5641	0.6481	0.6153	0.4872	0.6153	0.586
	ADTree	0.7454	0.7401	0.8159	0.7892	0.8298	0.78408			ADTree	0.6397	0.6958	0.743	0.6332	0.7274	0.68782
	Ridor	0.801	0.7567	0.717	0.8033	0.7087	0.75734			Ridor	0.661	0.7015	0.7567	0.717	0.6851	0.70426
	Mean MCC	0.69802	0.7177	0.73489	0.68267	0.72217				Mean MCC	0.62752	0.67065	0.67736	0.45322	0.66753

## Sheet: 50
50 features
mRNA		Feature Selection							miRNA		Feature Selection
		GainRatio	InfoGain	OneR	ReliefF	Fold Change	Mean MCC				GainRatio	InfoGain	OneR	ReliefF	Fold Change	Mean MCC
Ensemble Method	AdaBoostM1	0.7892	0.7892	0.7892	0.7739	0.7892	0.78614		Ensemble Method	AdaBoostM1	0.6771	0.6644	0.6332	0.7401	0.6931	0.68158
	Dagging	0.772	0.7892	0.8174	0.7892	0.7892	0.7914			Dagging	0.7266	0.7094	0.6771	0.6481	0.6772	0.68768
	LogitBoost	0.7859	0.801	0.801	0.8151	0.8159	0.80378			LogitBoost	0.7402	0.7089	0.7089	0.7243	0.7243	0.72132
	RandomCommittee	0.8174	0.8159	0.7764	0.7702	0.8299	0.80196			RandomCommittee	0.7412	0.801	0.7859	0.7274	0.7412	0.75934
	RandomForest	0.8299	0.8159	0.8174	0.7853	0.8159	0.81288			RandomForest	0.7718	0.8159	0.8159	0.7718	0.7859	0.79226
	RotationForest	0.8308	0.7739	0.7892	0.7859	0.8024	0.79644			RotationForest	0.7705	0.7707	0.7853	0.6771	0.7872	0.75816
	MultiClassClassifier	0.743	0.7675	0.8447	0.7298	0.8003	0.77706			MultiClassClassifier	0.6931	0.7249	0.6958	0.6798	0.6931	0.69734
	RandomSubSpace	0.8447	0.7892	0.8447	0.7853	0.8003	0.81284			RandomSubSpace	0.7718	0.7718	0.7855	0.6957	0.7094	0.74684
	Decorate	0.7454	0.7739	0.761	0.7739	0.8024	0.77132			Decorate	0.7718	0.8151	0.7702	0.7401	0.8299	0.78542
	MultiBoostAB	0.7892	0.7892	0.7892	0.7914	0.7892	0.78964			MultiBoostAB	0.6931	0.6062	0.7243	0.5932	0.661	0.65556
	Mean MCC	0.79475	0.79049	0.80302	0.78	0.80347				Mean MCC	0.73572	0.73883	0.73821	0.69976	0.73023
Single Classifier	SimpleLogistic	0.8151	0.7328	0.7585	0.743	0.801	0.77008		Single Classifier	SimpleLogistic	0.7087	0.7397	0.7402	0.7246	0.7089	0.72442
	NaiveBayes	0.7087	0.7187	0.7178	0.6609	0.7175	0.70472			NaiveBayes	0.6397	0.6636	0.6931	0.5038	0.755	0.65104
	LibSVM	0.783	0.743	0.7484	0.6601	0.5945	0.7058			LibSVM	0.6115	0.499	0.5298	0.3633	0.6497	0.53066
	LocalKnn	0.6124	0.7675	0.801	0.662	0.7087	0.71032			LocalKnn	0.4264	0.6801	0.525	0.4113	0.755	0.55956
	LibLINEAR	0.7204	0.783	0.4264	0.5726	0.2165	0.54378			LibLINEAR	0.5958	0.6636	0.6416	0.4123	0.6685	0.59636
	HoeffdingTree	0.6781	0.7187	0.7178	0.6627	0.7175	0.69896			HoeffdingTree	0.6437	0.6636	0.6798	0.5038	0.755	0.64918
	DecisionTable	0.7859	0.7739	0.8151	0.7585	0.8444	0.79556			DecisionTable	0.717	0.717	0.717	0.5972	0.717	0.69304
	CSForest	0.7249	0.7094	0.7094	0.7295	0.7249	0.71962			CSForest	0.5463	0.6481	0.6319	0.4507	0.6153	0.57846
	ADTree	0.761	0.7519	0.8044	0.764	0.8151	0.77928			ADTree	0.7011	0.7084	0.6689	0.6772	0.714	0.69392
	Ridor	0.6931	0.7099	0.7859	0.6447	0.8524	0.7372			Ridor	0.7204	0.6332	0.7401	0.7418	0.6798	0.70306
	Mean MCC	0.72826	0.74088	0.72847	0.6858	0.69925				Mean MCC	0.63106	0.66163	0.65674	0.5386	0.70182

## Sheet: 100
100 features
mRNA		Feature Selection							miRNA		Feature Selection
		GainRatio	InfoGain	OneR	ReliefF	Fold Change	Mean MCC				GainRatio	InfoGain	OneR	ReliefF	Fold Change	Mean MCC
Ensemble Method	AdaBoostM1	0.7892	0.7892	0.7739	0.7585	0.7892	0.78		Ensemble Method	AdaBoostM1	0.6231	0.6644	0.5894	0.6771	0.6601	0.64282
	Dagging	0.801	0.7859	0.7859	0.7739	0.7892	0.78718			Dagging	0.6957	0.7087	0.6642	0.7084	0.6957	0.69454
	LogitBoost	0.8159	0.8003	0.7859	0.7555	0.8151	0.79454			LogitBoost	0.6931	0.7099	0.7243	0.7089	0.7702	0.72128
	RandomCommittee	0.8024	0.7892	0.7764	0.801	0.8159	0.79698			RandomCommittee	0.8003	0.7274	0.755	0.6561	0.7853	0.74482
	RandomForest	0.8151	0.7872	0.8159	0.7707	0.8444	0.80666			RandomForest	0.7866	0.7866	0.8013	0.7266	0.8013	0.78048
	RotationForest	0.8151	0.801	0.8444	0.7555	0.801	0.8034			RotationForest	0.7855	0.7554	0.7099	0.7087	0.7567	0.74324
	MultiClassClassifier	0.6199	0.764	0.714	0.6397	0.5936	0.66624			MultiClassClassifier	0.7246	0.6958	0.7256	0.6027	0.6271	0.67516
	RandomSubSpace	0.7892	0.7892	0.8024	0.8159	0.8444	0.80822			RandomSubSpace	0.7718	0.7866	0.7554	0.7568	0.7568	0.76548
	Decorate	0.8159	0.801	0.8299	0.7859	0.8299	0.81252			Decorate	0.7866	0.7397	0.7866	0.7401	0.7707	0.76474
	MultiBoostAB	0.7892	0.7892	0.7892	0.7914	0.7892	0.78964			MultiBoostAB	0.7243	0.7246	0.6062	0.6968	0.7087	0.69212
	Mean MCC	0.78529	0.78962	0.79179	0.7648	0.79119				Mean MCC	0.73916	0.72991	0.71179	0.69822	0.73326
Single Classifier	SimpleLogistic	0.8151	0.8003	0.8003	0.7274	0.7702	0.78266		Single Classifier	SimpleLogistic	0.7718	0.7402	0.7112	0.7555	0.7707	0.74988
	NaiveBayes	0.7117	0.7208	0.7401	0.751	0.728	0.73032			NaiveBayes	0.6161	0.6821	0.6251	0.5556	0.743	0.64438
	LibSVM	0.7175	0.7178	0.7334	0.7558	0.6791	0.72072			LibSVM	0.4927	0.5181	0.5466	0.4053	0.6104	0.51462
	LocalKnn	0.6781	0.7918	0.772	0.661	0.7094	0.72246			LocalKnn	0.4663	0.6458	0.4462	0.3931	0.7554	0.54136
	LibLINEAR	0.4748	0.0779	0.7484	0.6601	0.5429	0.50082			LibLINEAR	0.4967	0.4368	0.4967	0.0641	0.4155	0.38196
	HoeffdingTree	0.6851	0.7208	0.7287	0.751	0.7178	0.72068			HoeffdingTree	0.6427	0.6316	0.6307	0.5458	0.743	0.63876
	DecisionTable	0.761	0.6854	0.8151	0.743	0.8299	0.76688			DecisionTable	0.717	0.717	0.717	0.666	0.717	0.7068
	CSForest	0.7249	0.7249	0.8003	0.7112	0.7554	0.74334			CSForest	0.6642	0.6957	0.6319	0.5641	0.6957	0.65032
	ADTree	0.7585	0.7554	0.7892	0.7675	0.8159	0.7773			ADTree	0.666	0.6982	0.6636	0.6807	0.7274	0.68718
	Ridor	0.7859	0.7298	0.7859	0.6456	0.7859	0.74662			Ridor	0.6016	0.6941	0.6308	0.6931	0.7243	0.66878
	Mean MCC	0.71126	0.67249	0.77134	0.71736	0.73345				Mean MCC	0.61351	0.64596	0.60998	0.53233	0.69024

## Sheet: 200
200 features
mRNA		Feature Selection							miRNA		Feature Selection
		GainRatio	InfoGain	OneR	ReliefF	Fold Change	Mean MCC				GainRatio	InfoGain	OneR	ReliefF	Fold Change	Mean MCC
Ensemble Method	AdaBoostM1	0.7892	0.7892	0.7892	0.7117	0.7892	0.7737		Ensemble Method	AdaBoostM1	0.6027	0.5765	0.6165	0.714	0.6027	0.62248
	Dagging	0.7872	0.7892	0.8003	0.801	0.7764	0.79082			Dagging	0.7249	0.7266	0.7112	0.6807	0.7418	0.71704
	LogitBoost	0.8151	0.801	0.801	0.6885	0.8444	0.79			LogitBoost	0.7243	0.7412	0.7089	0.6772	0.6958	0.70948
	RandomCommittee	0.7859	0.8024	0.7892	0.7859	0.7892	0.79052			RandomCommittee	0.8003	0.801	0.7866	0.7555	0.7855	0.78578
	RandomForest	0.8151	0.8174	0.8308	0.7707	0.801	0.807			RandomForest	0.7554	0.7705	0.7554	0.7266	0.7718	0.75594
	RotationForest	0.8308	0.8024	0.7739	0.7859	0.8159	0.80178			RotationForest	0.8013	0.7702	0.7866	0.7402	0.7243	0.76452
	MultiClassClassifier	0.4572	0.4218	0.4893	0.5797	0.4738	0.48436			MultiClassClassifier	0.5525	0.5916	0.3498	0.4387	0.4912	0.48476
	RandomSubSpace	0.8308	0.8447	0.8447	0.8299	0.8308	0.83618			RandomSubSpace	0.7718	0.7402	0.7718	0.693	0.7568	0.74672
	Decorate	0.8298	0.8299	0.7859	0.7872	0.7859	0.80374			Decorate	0.7705	0.8013	0.6798	0.7554	0.7866	0.75872
	MultiBoostAB	0.7892	0.7892	0.7892	0.7484	0.7892	0.78104			MultiBoostAB	0.7246	0.7246	0.7246	0.7454	0.7246	0.72876
	Mean MCC	0.77303	0.76872	0.76935	0.74889	0.76958				Mean MCC	0.72283	0.72437	0.68912	0.69267	0.70811
Single Classifier	SimpleLogistic	0.7243	0.8308	0.7702	0.6636	0.7853	0.75484		Single Classifier	SimpleLogistic	0.7554	0.7087	0.7402	0.662	0.7705	0.72736
	NaiveBayes	0.7117	0.7017	0.7454	0.6927	0.7385	0.718			NaiveBayes	0.6854	0.6807	0.5965	0.5895	0.6851	0.64744
	LibSVM	0.728	0.6917	0.764	0.7397	0.7287	0.73042			LibSVM	0.4784	0.5382	0.5198	0.4907	0.6689	0.5392
	LocalKnn	0.4862	0.8308	0.7567	0.7087	0.8003	0.71654			LocalKnn	0.2498	0.5641	0.2588	0.3697	0.6458	0.41764
	LibLINEAR	0.576	0.6941	0.6027	0.4772	0.568	0.5836			LibLINEAR	0.7226	0.7585	0.6635	0.3061	0.5772	0.60558
	HoeffdingTree	0.7117	0.7017	0.7204	0.6599	0.728	0.70434			HoeffdingTree	0.6327	0.6968	0.5767	0.5702	0.6644	0.62816
	DecisionTable	0.6924	0.8298	0.8151	0.7585	0.8044	0.78004			DecisionTable	0.717	0.717	0.717	0.7707	0.717	0.72774
	CSForest	0.7249	0.7249	0.8003	0.6801	0.7402	0.73408			CSForest	0.6642	0.6481	0.6642	0.5985	0.6642	0.64784
	ADTree	0.761	0.8003	0.8003	0.7795	0.8299	0.7942			ADTree	0.7256	0.6481	0.714	0.755	0.7246	0.71346
	Ridor	0.7554	0.7401	0.8003	0.7266	0.7412	0.75272			Ridor	0.7795	0.7084	0.7246	0.5685	0.693	0.6948
	Mean MCC	0.68716	0.75459	0.75754	0.68865	0.74645				Mean MCC	0.64106	0.66686	0.61753	0.56809	0.68107

## Sheet: 300
300 features
mRNA		Feature Selection							miRNA		Feature Selection
		GainRatio	InfoGain	OneR	ReliefF	Fold Change	Mean MCC				GainRatio	InfoGain	OneR	ReliefF	Fold Change	Mean MCC
Ensemble Method	AdaBoostM1	0.7892	0.7892	0.7892	0.761	0.7892	0.78356		Ensemble Method	AdaBoostM1	0.6689	0.6689	0.5862	0.6027	0.6027	0.62588
	Dagging	0.8299	0.7892	0.7585	0.7567	0.772	0.78126			Dagging	0.7418	0.7249	0.7266	0.693	0.7418	0.72562
	LogitBoost	0.8003	0.8151	0.8298	0.7274	0.8444	0.8034			LogitBoost	0.6931	0.6772	0.7087	0.6941	0.6958	0.69378
	RandomCommittee	0.8159	0.801	0.8044	0.8159	0.7918	0.8058			RandomCommittee	0.7555	0.755	0.7397	0.7859	0.7274	0.7527
	RandomForest	0.801	0.8174	0.8159	0.8151	0.8159	0.81306			RandomForest	0.8013	0.8013	0.7568	0.7243	0.7243	0.7616
	RotationForest	0.7859	0.8308	0.8159	0.7484	0.8044	0.79708			RotationForest	0.755	0.755	0.7705	0.7555	0.8003	0.76726
	MultiClassClassifier	0.4405	0.3776	0.347	0.4585	0.3517	0.39506			MultiClassClassifier	0.4747	0.4243	0.3072	0.4055	0.2887	0.38008
	RandomSubSpace	0.8159	0.8151	0.7739	0.8159	0.8299	0.81014			RandomSubSpace	0.7855	0.7554	0.7866	0.7554	0.7718	0.77094
	Decorate	0.7892	0.8174	0.8174	0.7859	0.8299	0.80796			Decorate	0.8151	0.7718	0.7707	0.7853	0.7853	0.78564
	MultiBoostAB	0.7892	0.7892	0.7892	0.7484	0.7892	0.78104			MultiBoostAB	0.7246	0.7246	0.7246	0.7401	0.7401	0.7308
	Mean MCC	0.7657	0.7642	0.75412	0.74332	0.76184				Mean MCC	0.72155	0.70584	0.68776	0.69418	0.68782
Single Classifier	SimpleLogistic	0.8003	0.8308	0.8003	0.6798	0.7853	0.7793		Single Classifier	SimpleLogistic	0.662	0.7266	0.6781	0.7402	0.7705	0.71548
	NaiveBayes	0.743	0.7338	0.743	0.6596	0.7385	0.72358			NaiveBayes	0.696	0.7226	0.6558	0.653	0.6262	0.67072
	LibSVM	0.6953	0.6905	0.728	0.761	0.6431	0.70358			LibSVM	0.5666	0.5307	0.5427	0.5733	0.7117	0.585
	LocalKnn	0.5463	0.7859	0.7707	0.6931	0.7855	0.7163			LocalKnn	0.2901	0.2901	0.2236	0.3697	0.5641	0.34752
	LibLINEAR	0.3786	0.3244	0.564	0.5657	0.5826	0.48306			LibLINEAR	0.7128	0.6458	0.487	0.6044	0.7555	0.6411
	HoeffdingTree	0.7274	0.7338	0.743	0.6679	0.7178	0.71798			HoeffdingTree	0.6754	0.6917	0.6279	0.6327	0.6161	0.64876
	DecisionTable	0.6924	0.8298	0.8151	0.7585	0.8151	0.78218			DecisionTable	0.6763	0.717	0.717	0.717	0.717	0.70886
	CSForest	0.7554	0.8003	0.7705	0.6642	0.7249	0.74306			CSForest	0.6801	0.6642	0.6642	0.6153	0.6801	0.66078
	ADTree	0.7764	0.8299	0.783	0.7401	0.7519	0.77626			ADTree	0.6798	0.6798	0.615	0.6763	0.6437	0.65892
	Ridor	0.7554	0.8003	0.7795	0.7328	0.8024	0.77408			Ridor	0.6124	0.5685	0.5685	0.6801	0.6772	0.62134
	Mean MCC	0.68705	0.73595	0.74971	0.69227	0.73471				Mean MCC	0.62515	0.6237	0.57798	0.6262	0.67621

## Sheet: 500
500 features
mRNA		Feature Selection							miRNA		Feature Selection
		GainRatio	InfoGain	OneR	ReliefF	Fold Change	Mean MCC				GainRatio	InfoGain	OneR	ReliefF	Fold Change	Mean MCC
Ensemble Method	AdaBoostM1	0.7892	0.7892	0.8159	0.7585	0.7892	0.7884		Ensemble Method	AdaBoostM1	0.6689	0.6689	0.5862	0.6027	0.6027	0.62588
	Dagging	0.7859	0.7739	0.755	0.7567	0.8003	0.77436			Dagging	0.6938	0.7554	0.7568	0.6957	0.6642	0.71318
	LogitBoost	0.8151	0.8444	0.8151	0.7567	0.801	0.80646			LogitBoost	0.6931	0.6772	0.7087	0.6941	0.6958	0.69378
	RandomCommittee	0.7555	0.7764	0.7872	0.801	0.8044	0.7849			RandomCommittee	0.7555	0.755	0.7397	0.7859	0.7274	0.7527
	RandomForest	0.8151	0.801	0.772	0.7853	0.8299	0.80066			RandomForest	0.8013	0.8013	0.7568	0.7243	0.7243	0.7616
	RotationForest	0.8024	0.8174	0.8024	0.7707	0.801	0.79878			RotationForest	0.755	0.755	0.7705	0.7555	0.8003	0.76726
	MultiClassClassifier	0.3658	0.1974	0.385	0.4685	0.2887	0.34108			MultiClassClassifier	0.4747	0.4243	0.3072	0.4055	0.2887	0.38008
	RandomSubSpace	0.8024	0.7892	0.8024	0.8003	0.8299	0.80484			RandomSubSpace	0.7855	0.7554	0.7866	0.7554	0.7718	0.77094
	Decorate	0.7853	0.8159	0.8159	0.801	0.7859	0.8008			Decorate	0.8151	0.7718	0.7707	0.7853	0.7853	0.78564
	MultiBoostAB	0.7892	0.7892	0.7892	0.7484	0.7892	0.78104			MultiBoostAB	0.7246	0.7246	0.7246	0.7401	0.7401	0.7308
	Mean MCC	0.75059	0.7394	0.75401	0.74471	0.75195				Mean MCC	0.71675	0.70889	0.69078	0.69445	0.68006
Single Classifier	SimpleLogistic	0.6689	0.8308	0.8003	0.714	0.8151	0.76582		Single Classifier	SimpleLogistic	0.662	0.7266	0.6781	0.7402	0.7705	0.71548
	NaiveBayes	0.7585	0.728	0.7707	0.6849	0.7558	0.73958			NaiveBayes	0.696	0.7226	0.6558	0.653	0.6262	0.67072
	LibSVM	0.7334	0.7084	0.7707	0.755	0.6968	0.73286			LibSVM	0.5721	0.5829	0.5098	0.5915	0.7117	0.5936
	LocalKnn	0.5611	0.7853	0.7402	0.6931	0.7866	0.71326			LocalKnn	0.2901	0.2901	0.2236	0.3697	0.5641	0.34752
	LibLINEAR	0.4427	0.5726	0.4689	0.6416	0.4893	0.52302			LibLINEAR	0.7128	0.6458	0.487	0.6044	0.7555	0.6411
	HoeffdingTree	0.7298	0.7178	0.7707	0.6936	0.7334	0.72906			HoeffdingTree	0.6754	0.6917	0.6279	0.6327	0.6161	0.64876
	DecisionTable	0.8151	0.8151	0.8299	0.7585	0.8299	0.8097			DecisionTable	0.6763	0.717	0.717	0.717	0.717	0.70886
	CSForest	0.7705	0.7554	0.8003	0.6319	0.7855	0.74872			CSForest	0.6481	0.6481	0.6481	0.6319	0.6153	0.6383
	ADTree	0.764	0.783	0.783	0.7492	0.7484	0.76552			ADTree	0.6798	0.6798	0.615	0.6763	0.6437	0.65892
	Ridor	0.7795	0.8003	0.7795	0.7555	0.7707	0.7771			Ridor	0.6124	0.5685	0.5685	0.6801	0.6772	0.62134
	Mean MCC	0.70235	0.74967	0.75142	0.70773	0.74115				Mean MCC	0.6225	0.62731	0.57308	0.62968	0.66973
