# Supplementary material for: Improving Model Performance on the Stratification of Breast Cancer Patients by Integrating Multiscale Genomic Features
Source: Biomed Res Int. 2020 Aug 25;2020:1475368. doi: 10.1155/2020/1475368 (PMC7471833; doi:10.1155/2020/1475368)
Supplement: Supplementary 12 — Supplementary Table 8. The ACCs achieved by different machine learning algorithms combined with different feature selection methods in BRCA. [file 1475368.f12.xlsx]

## Sheet: 30
30 features
mRNA		Feature Selection								miRNA		Feature Selection
		GainRatio	InfoGain	OneR	ReliefF	Fold Change	Mean ACC					GainRatio	InfoGain	OneR	ReliefF	Fold Change	Mean ACC
Ensemble Method	AdaBoostM1	0.9272	0.9272	0.9272	0.9029	0.9272	0.92234			Ensemble Method	AdaBoostM1	0.8301	0.8835	0.9223	0.8981	0.9078	0.88836
	Dagging	0.9223	0.9223	0.9369	0.9126	0.932	0.92522				Dagging	0.8835	0.9126	0.9029	0.8786	0.8932	0.89416
	LogitBoost	0.9369	0.9223	0.9369	0.932	0.9369	0.933				LogitBoost	0.8883	0.8981	0.9029	0.8932	0.9175	0.9
	RandomCommittee	0.9369	0.932	0.9272	0.9175	0.9272	0.92816				RandomCommittee	0.9126	0.932	0.9126	0.9078	0.9175	0.9165
	RandomForest	0.932	0.9369	0.9417	0.9223	0.9369	0.93396				RandomForest	0.9223	0.9369	0.932	0.9223	0.932	0.9291
	RotationForest	0.9417	0.932	0.9417	0.9272	0.9369	0.9359				RotationForest	0.9175	0.9126	0.9223	0.9078	0.9175	0.91554
	MultiClassClassifier	0.9272	0.9272	0.932	0.9078	0.9272	0.92428				MultiClassClassifier	0.8981	0.8981	0.8981	0.8835	0.9078	0.89712
	RandomSubSpace	0.9272	0.9369	0.9466	0.9369	0.932	0.93592				RandomSubSpace	0.9078	0.9223	0.932	0.9126	0.9223	0.9194
	Decorate	0.9369	0.932	0.8981	0.932	0.9175	0.9233				Decorate	0.9126	0.9078	0.9078	0.9223	0.9223	0.91456
	MultiBoostAB	0.9272	0.9272	0.9272	0.9223	0.9272	0.92622				MultiBoostAB	0.835	0.9078	0.9078	0.835	0.8883	0.87478
	Mean ACC	0.93155	0.9296	0.93155	0.92135	0.9301					Mean ACC	0.89078	0.91117	0.91407	0.89612	0.91262
Single Classifier	SimpleLogistic	0.9175	0.9223	0.932	0.932	0.9272	0.9262			Single Classifier	SimpleLogistic	0.9029	0.9126	0.9078	0.8835	0.9078	0.90292
	NaiveBayes	0.8981	0.8641	0.8786	0.8544	0.8932	0.87768				NaiveBayes	0.8641	0.8932	0.9078	0.7961	0.9029	0.87282
	LibSVM	0.7718	0.767	0.7718	0.7718	0.7718	0.77084				LibSVM	0.7621	0.7718	0.7718	0.7718	0.7718	0.76986
	LocalKnn	0.8641	0.932	0.932	0.9078	0.8835	0.90388				LocalKnn	0.8398	0.8835	0.8738	0.8107	0.9223	0.86602
	LibLINEAR	0.8592	0.7816	0.8107	0.7379	0.8835	0.81458				LibLINEAR	0.8738	0.8689	0.8786	0.2379	0.8252	0.73688
	HoeffdingTree	0.8981	0.8641	0.8786	0.9126	0.8932	0.88932				HoeffdingTree	0.8641	0.8932	0.9029	0.7961	0.9029	0.87184
	DecisionTable	0.9272	0.9272	0.9369	0.9175	0.9369	0.92914				DecisionTable	0.9029	0.9029	0.9029	0.8835	0.9029	0.89902
	CSForest	0.9078	0.9029	0.9029	0.9175	0.8981	0.90584				CSForest	0.8592	0.8835	0.8738	0.8398	0.8738	0.86602
	ADTree	0.9126	0.9078	0.9369	0.9272	0.9417	0.92524				ADTree	0.8786	0.8981	0.9126	0.8786	0.9078	0.89514
	Ridor	0.932	0.9175	0.9029	0.932	0.9029	0.91746				Ridor	0.8883	0.8932	0.9175	0.9029	0.8932	0.89902
	Mean ACC	0.88884	0.87865	0.88833	0.88107	0.8932					Mean ACC	0.86358	0.88009	0.88495	0.78009	0.88106

## Sheet: 50
50 features
mRNA		Feature Selection								miRNA		Feature Selection
		GainRatio	InfoGain	OneR	ReliefF	Fold Change	Mean ACC					GainRatio	InfoGain	OneR	ReliefF	Fold Change	Mean ACC
Ensemble Method	AdaBoostM1	0.9272	0.9272	0.9272	0.9223	0.9272	0.92622			Ensemble Method	AdaBoostM1	0.8932	0.8835	0.8786	0.9126	0.8981	0.8932
	Dagging	0.9223	0.9272	0.9369	0.9272	0.9272	0.92816				Dagging	0.9078	0.9029	0.8932	0.8786	0.8932	0.89514
	LogitBoost	0.9272	0.932	0.932	0.9369	0.9369	0.933				LogitBoost	0.9126	0.9029	0.9029	0.9078	0.9078	0.9068
	RandomCommittee	0.9369	0.9369	0.9223	0.9223	0.9417	0.93202				RandomCommittee	0.9126	0.932	0.9272	0.9078	0.9126	0.91844
	RandomForest	0.9417	0.9369	0.9369	0.9272	0.9369	0.93592				RandomForest	0.9223	0.9369	0.9369	0.9223	0.9272	0.92912
	RotationForest	0.9417	0.9223	0.9272	0.9272	0.932	0.93008				RotationForest	0.9223	0.9223	0.9272	0.8932	0.9272	0.91844
	MultiClassClassifier	0.9126	0.9175	0.9466	0.9078	0.932	0.9233				MultiClassClassifier	0.8981	0.9078	0.8981	0.8932	0.8981	0.89906
	RandomSubSpace	0.9466	0.9272	0.9466	0.9272	0.932	0.93592				RandomSubSpace	0.9223	0.9223	0.9272	0.8981	0.9029	0.91456
	Decorate	0.9126	0.9223	0.9175	0.9223	0.932	0.92134				Decorate	0.9223	0.9369	0.9223	0.9126	0.9417	0.92716
	MultiBoostAB	0.9272	0.9272	0.9272	0.9223	0.9272	0.92622				MultiBoostAB	0.8981	0.8544	0.9078	0.835	0.8883	0.87672
	Mean ACC	0.9296	0.92767	0.93204	0.92427	0.93251					Mean ACC	0.91116	0.91019	0.91214	0.89612	0.90971
Single Classifier	SimpleLogistic	0.9369	0.9078	0.9175	0.9126	0.932	0.92136			Single Classifier	SimpleLogistic	0.9029	0.9126	0.9126	0.9078	0.9029	0.90776
	NaiveBayes	0.9029	0.8835	0.8932	0.8641	0.8981	0.88836				NaiveBayes	0.8786	0.8883	0.8981	0.8252	0.9175	0.88154
	LibSVM	0.7718	0.7718	0.7718	0.7718	0.7718	0.7718				LibSVM	0.7718	0.7718	0.7718	0.7718	0.7718	0.7718
	LocalKnn	0.8738	0.9175	0.932	0.8883	0.9029	0.9029				LocalKnn	0.8252	0.8932	0.8495	0.8204	0.9175	0.86116
	LibLINEAR	0.9029	0.9223	0.8252	0.8447	0.7282	0.84466				LibLINEAR	0.8689	0.8883	0.8738	0.665	0.8641	0.83202
	HoeffdingTree	0.8932	0.8835	0.8932	0.8689	0.8981	0.88738				HoeffdingTree	0.8786	0.8883	0.8932	0.8252	0.9175	0.88056
	DecisionTable	0.9272	0.9223	0.9369	0.9175	0.9466	0.9301				DecisionTable	0.9029	0.9029	0.9029	0.8689	0.9029	0.8961
	CSForest	0.9078	0.9029	0.9029	0.9078	0.9078	0.90584				CSForest	0.8544	0.8835	0.8786	0.8301	0.8738	0.86408
	ADTree	0.9175	0.9126	0.932	0.9175	0.9369	0.9233				ADTree	0.8981	0.8981	0.8883	0.8932	0.9029	0.89612
	Ridor	0.8981	0.9029	0.9272	0.8835	0.9466	0.91166				Ridor	0.9029	0.8786	0.9126	0.9126	0.8835	0.89804
	Mean ACC	0.89321	0.89271	0.89319	0.87767	0.8869					Mean ACC	0.86843	0.88056	0.87814	0.83202	0.88544

## Sheet: 100
100 features
mRNA		Feature Selection								miRNA		Feature Selection
		GainRatio	InfoGain	OneR	ReliefF	Fold Change	Mean ACC					GainRatio	InfoGain	OneR	ReliefF	Fold Change	Mean ACC
Ensemble Method	AdaBoostM1	0.9272	0.9272	0.9223	0.9175	0.9272	0.92428			Ensemble Method	AdaBoostM1	0.8738	0.8835	0.8641	0.8932	0.8835	0.87962
	Dagging	0.932	0.9272	0.9272	0.9223	0.9272	0.92718				Dagging	0.8981	0.9029	0.8883	0.8981	0.8981	0.8971
	LogitBoost	0.9369	0.932	0.9272	0.9175	0.9369	0.9301				LogitBoost	0.8981	0.9029	0.9078	0.9029	0.9223	0.9068
	RandomCommittee	0.932	0.9272	0.9223	0.932	0.9369	0.93008				RandomCommittee	0.932	0.9078	0.9175	0.8835	0.9272	0.9136
	RandomForest	0.9369	0.9272	0.9369	0.9223	0.9466	0.93398				RandomForest	0.9272	0.9272	0.932	0.9078	0.932	0.92524
	RotationForest	0.9369	0.932	0.9466	0.9175	0.932	0.933				RotationForest	0.9272	0.9175	0.9029	0.9029	0.9175	0.9136
	MultiClassClassifier	0.8689	0.9175	0.9029	0.8786	0.8641	0.8864				MultiClassClassifier	0.9078	0.8981	0.9078	0.8689	0.8738	0.89128
	RandomSubSpace	0.9272	0.9272	0.932	0.9369	0.9466	0.93398				RandomSubSpace	0.9223	0.9272	0.9175	0.9175	0.9175	0.9204
	Decorate	0.9369	0.932	0.9417	0.9272	0.9417	0.9359				Decorate	0.9272	0.9126	0.9272	0.9126	0.9223	0.92038
	MultiBoostAB	0.9272	0.9272	0.9272	0.9223	0.9272	0.92622				MultiBoostAB	0.9078	0.9078	0.8544	0.8932	0.9029	0.89322
	Mean ACC	0.92621	0.92767	0.92863	0.91941	0.92864					Mean ACC	0.91215	0.90875	0.90195	0.89806	0.90971
Single Classifier	SimpleLogistic	0.9369	0.932	0.932	0.9078	0.9223	0.9262			Single Classifier	SimpleLogistic	0.9223	0.9126	0.9029	0.9175	0.9223	0.91552
	NaiveBayes	0.9029	0.8883	0.9078	0.8932	0.8981	0.89806				NaiveBayes	0.8592	0.8932	0.8689	0.8398	0.9126	0.87474
	LibSVM	0.7718	0.7718	0.7718	0.7718	0.7718	0.7718				LibSVM	0.7718	0.7718	0.7718	0.7718	0.7718	0.7718
	LocalKnn	0.8932	0.9272	0.9223	0.8883	0.9029	0.90678				LocalKnn	0.835	0.8835	0.8301	0.8155	0.9175	0.85632
	LibLINEAR	0.7718	0.7087	0.9126	0.8835	0.8252	0.82036				LibLINEAR	0.8398	0.8252	0.8398	0.7718	0.8204	0.8194
	HoeffdingTree	0.8932	0.8883	0.9029	0.8932	0.8932	0.89416				HoeffdingTree	0.8689	0.8738	0.8689	0.835	0.9126	0.87184
	DecisionTable	0.9175	0.8883	0.9369	0.9126	0.9417	0.9194				DecisionTable	0.9029	0.9029	0.9029	0.8883	0.9029	0.89998
	CSForest	0.9078	0.9078	0.932	0.9029	0.9175	0.9136				CSForest	0.8883	0.8981	0.8786	0.8592	0.8981	0.88446
	ADTree	0.9175	0.9175	0.9272	0.9175	0.9369	0.92332				ADTree	0.8883	0.8981	0.8883	0.8883	0.9078	0.89416
	Ridor	0.9272	0.9078	0.9272	0.8835	0.9272	0.91458				Ridor	0.835	0.8981	0.8786	0.8981	0.9029	0.88254
	Mean ACC	0.88398	0.87377	0.90727	0.88543	0.89368					Mean ACC	0.86115	0.87573	0.86308	0.84853	0.88689

## Sheet: 200
200 features
mRNA		Feature Selection								miRNA		Feature Selection
		GainRatio	InfoGain	OneR	ReliefF	Fold Change	Mean ACC					GainRatio	InfoGain	OneR	ReliefF	Fold Change	Mean ACC
Ensemble Method	AdaBoostM1	0.9272	0.9272	0.9272	0.9029	0.9272	0.92234			Ensemble Method	AdaBoostM1	0.8689	0.8592	0.8738	0.9029	0.8689	0.87474
	Dagging	0.9272	0.9272	0.932	0.932	0.9223	0.92814				Dagging	0.9078	0.9078	0.9029	0.8883	0.9126	0.90388
	LogitBoost	0.9369	0.932	0.932	0.8932	0.9466	0.92814				LogitBoost	0.9078	0.9126	0.9029	0.8932	0.8981	0.90292
	RandomCommittee	0.9272	0.932	0.9272	0.9272	0.9272	0.92816				RandomCommittee	0.932	0.932	0.9272	0.9175	0.9272	0.92718
	RandomForest	0.9369	0.9369	0.9417	0.9223	0.932	0.93396				RandomForest	0.9175	0.9223	0.9175	0.9078	0.9223	0.91748
	RotationForest	0.9417	0.932	0.9223	0.9272	0.9369	0.93202				RotationForest	0.932	0.9223	0.9272	0.9126	0.9078	0.92038
	MultiClassClassifier	0.8204	0.7816	0.8252	0.8447	0.801	0.81458				MultiClassClassifier	0.8447	0.8592	0.7621	0.7913	0.8058	0.81262
	RandomSubSpace	0.9417	0.9466	0.9466	0.9417	0.9417	0.94366				RandomSubSpace	0.9223	0.9126	0.9223	0.8981	0.9175	0.91456
	Decorate	0.9417	0.9417	0.9272	0.9272	0.9272	0.933				Decorate	0.9223	0.932	0.8932	0.9175	0.9272	0.91844
	MultiBoostAB	0.9272	0.9272	0.9272	0.9126	0.9272	0.92428				MultiBoostAB	0.9078	0.9078	0.9078	0.9126	0.9078	0.90876
	Mean ACC	0.92281	0.91844	0.92086	0.9131	0.91893					Mean ACC	0.90631	0.90678	0.89369	0.89418	0.89952
Single Classifier	SimpleLogistic	0.9078	0.9417	0.9223	0.8883	0.9272	0.91746			Single Classifier	SimpleLogistic	0.9175	0.9029	0.9126	0.8883	0.9223	0.90872
	NaiveBayes	0.9029	0.8883	0.9126	0.8689	0.9029	0.89512				NaiveBayes	0.8883	0.8883	0.8495	0.8495	0.8932	0.87376
	LibSVM	0.7718	0.7718	0.7718	0.7718	0.7718	0.7718				LibSVM	0.7718	0.7718	0.7718	0.7718	0.7718	0.7718
	LocalKnn	0.8398	0.9417	0.9175	0.9029	0.932	0.90678				LocalKnn	0.7913	0.8592	0.7913	0.8107	0.8835	0.8272
	LibLINEAR	0.8495	0.8981	0.8689	0.7864	0.8301	0.8466				LibLINEAR	0.8981	0.9175	0.8786	0.5437	0.8641	0.8204
	HoeffdingTree	0.9029	0.8883	0.9029	0.8592	0.8981	0.89028				HoeffdingTree	0.8641	0.8932	0.835	0.8398	0.8835	0.86312
	DecisionTable	0.8932	0.9417	0.9369	0.9175	0.932	0.92426				DecisionTable	0.9029	0.9029	0.9029	0.9223	0.9029	0.90678
	CSForest	0.9078	0.9078	0.932	0.8932	0.9126	0.91068				CSForest	0.8883	0.8835	0.8883	0.8689	0.8883	0.88346
	ADTree	0.9175	0.932	0.932	0.9223	0.9417	0.9291				ADTree	0.9078	0.8786	0.9029	0.9175	0.9078	0.90292
	Ridor	0.9175	0.9078	0.932	0.9078	0.9126	0.91554				Ridor	0.9223	0.8981	0.9078	0.8592	0.8981	0.8971
	Mean ACC	0.88107	0.90192	0.90289	0.87183	0.8961					Mean ACC	0.87524	0.8796	0.86407	0.82717	0.88155

## Sheet: 300
300 features
mRNA		Feature Selection								miRNA		Feature Selection
		GainRatio	InfoGain	OneR	ReliefF	Fold Change	Mean ACC					GainRatio	InfoGain	OneR	ReliefF	Fold Change	Mean ACC
Ensemble Method	AdaBoostM1	0.9272	0.9272	0.9272	0.9175	0.9272	0.92526			Ensemble Method	AdaBoostM1	0.8592	0.8689	0.8883	0.8835	0.8689	0.87376
	Dagging	0.9466	0.9417	0.9369	0.9417	0.9417	0.94172				Dagging	0.9223	0.9272	0.9272	0.9272	0.9223	0.92524
	LogitBoost	0.932	0.9369	0.9417	0.9078	0.9466	0.933				LogitBoost	0.9078	0.8981	0.8981	0.8981	0.8981	0.90004
	RandomCommittee	0.9369	0.932	0.932	0.9369	0.9272	0.933				RandomCommittee	0.9029	0.9078	0.9272	0.9126	0.9126	0.91262
	RandomForest	0.932	0.9369	0.9369	0.9369	0.9369	0.93592				RandomForest	0.932	0.932	0.9223	0.8981	0.9272	0.92232
	RotationForest	0.9272	0.9417	0.9369	0.9126	0.932	0.93008				RotationForest	0.9272	0.9272	0.9272	0.9126	0.9175	0.92234
	MultiClassClassifier	0.8058	0.7476	0.7767	0.8107	0.7573	0.77962				MultiClassClassifier	0.8301	0.7718	0.801	0.7573	0.8301	0.79806
	RandomSubSpace	0.9369	0.9369	0.9223	0.9369	0.9417	0.93494				RandomSubSpace	0.9223	0.9272	0.9272	0.9272	0.9126	0.9233
	Decorate	0.9272	0.9369	0.9369	0.9272	0.9417	0.93398				Decorate	0.9078	0.932	0.9078	0.9369	0.9175	0.9204
	MultiBoostAB	0.9272	0.9272	0.9272	0.9126	0.9272	0.92428				MultiBoostAB	0.9078	0.9078	0.9078	0.8544	0.9126	0.89808
	Mean ACC	0.9199	0.9165	0.91747	0.91408	0.91795					Mean ACC	0.90194	0.9	0.90341	0.89079	0.90194
Single Classifier	SimpleLogistic	0.932	0.9417	0.932	0.8932	0.9272	0.92522			Single Classifier	SimpleLogistic	0.9223	0.9223	0.9272	0.9126	0.9369	0.92426
	NaiveBayes	0.9126	0.8981	0.9126	0.8544	0.9029	0.89612				NaiveBayes	0.8786	0.8932	0.8786	0.8495	0.8592	0.87182
	LibSVM	0.7718	0.7718	0.7718	0.7718	0.7718	0.7718				LibSVM	0.7718	0.7718	0.7718	0.7718	0.7718	0.7718
	LocalKnn	0.8544	0.9272	0.9223	0.8981	0.9272	0.90584				LocalKnn	0.7913	0.8447	0.7913	0.8155	0.8689	0.82234
	LibLINEAR	0.8058	0.7913	0.8544	0.8447	0.8495	0.82914				LibLINEAR	0.7961	0.8786	0.9029	0.9078	0.835	0.86408
	HoeffdingTree	0.9078	0.8981	0.9126	0.8592	0.8932	0.89418				HoeffdingTree	0.8641	0.8835	0.8495	0.835	0.8592	0.85826
	DecisionTable	0.8932	0.9417	0.9369	0.9175	0.9369	0.92524				DecisionTable	0.8738	0.9029	0.9029	0.8981	0.9029	0.89612
	CSForest	0.7718	0.7718	0.7718	0.7718	0.7718	0.7718				CSForest	0.7718	0.7718	0.7718	0.7718	0.7718	0.7718
	ADTree	0.9223	0.9417	0.9223	0.9078	0.9126	0.92134				ADTree	0.8835	0.8641	0.8786	0.8883	0.8932	0.88154
	Ridor	0.9175	0.932	0.9223	0.9078	0.932	0.92232				Ridor	0.8592	0.9029	0.9078	0.8641	0.8932	0.88544
	Mean ACC	0.86892	0.88154	0.8859	0.86263	0.88251					Mean ACC	0.84125	0.86358	0.85824	0.85145	0.85921

## Sheet: 500
500 features
mRNA		Feature Selection								miRNA		Feature Selection
		GainRatio	InfoGain	OneR	ReliefF	Fold Change	Mean ACC					GainRatio	InfoGain	OneR	ReliefF	Fold Change	Mean ACC
Ensemble Method	AdaBoostM1	0.9272	0.9272	0.9369	0.9175	0.9272	0.9272			Ensemble Method	AdaBoostM1	0.8883	0.8883	0.8592	0.8689	0.8689	0.87472
	Dagging	0.9272	0.9223	0.9175	0.9175	0.932	0.9233				Dagging	0.8981	0.9175	0.9175	0.8981	0.8883	0.9039
	LogitBoost	0.9369	0.9466	0.9369	0.9175	0.932	0.93398				LogitBoost	0.8981	0.8932	0.9029	0.8981	0.8981	0.89808
	RandomCommittee	0.9175	0.9223	0.9272	0.932	0.932	0.9262				RandomCommittee	0.9175	0.9175	0.9126	0.9272	0.9078	0.91652
	RandomForest	0.9369	0.932	0.9223	0.9272	0.9417	0.93202				RandomForest	0.932	0.932	0.9175	0.9078	0.9078	0.91942
	RotationForest	0.932	0.9369	0.932	0.9223	0.932	0.93104				RotationForest	0.9175	0.9175	0.9223	0.9175	0.932	0.92136
	MultiClassClassifier	0.7816	0.7087	0.7767	0.8155	0.7379	0.76408				MultiClassClassifier	0.8107	0.8058	0.7427	0.7718	0.7379	0.77378
	RandomSubSpace	0.932	0.9272	0.932	0.932	0.9417	0.93298				RandomSubSpace	0.9272	0.9175	0.9272	0.9175	0.9223	0.92234
	Decorate	0.9272	0.9369	0.9369	0.932	0.9272	0.93204				Decorate	0.9369	0.9223	0.9223	0.9272	0.9272	0.92718
	MultiBoostAB	0.9272	0.9272	0.9272	0.9126	0.9272	0.92428				MultiBoostAB	0.9078	0.9078	0.9078	0.9126	0.9126	0.90972
	Mean ACC	0.91457	0.90873	0.91456	0.91261	0.91309					Mean ACC	0.90341	0.90194	0.8932	0.89467	0.89029
Single Classifier	SimpleLogistic	0.8883	0.9417	0.932	0.9029	0.9369	0.92036			Single Classifier	SimpleLogistic	0.8883	0.9078	0.8932	0.9126	0.9223	0.90484
	NaiveBayes	0.9175	0.8981	0.9223	0.8689	0.9126	0.90388				NaiveBayes	0.8883	0.8981	0.8689	0.8738	0.8641	0.87864
	LibSVM	0.7718	0.7718	0.7718	0.7718	0.7718	0.7718				LibSVM	0.7718	0.7718	0.7718	0.7718	0.7718	0.7718
	LocalKnn	0.8592	0.9272	0.9126	0.8981	0.9272	0.90486				LocalKnn	0.7961	0.7961	0.7864	0.8107	0.8592	0.8097
	LibLINEAR	0.8107	0.8447	0.8252	0.8738	0.8252	0.83592				LibLINEAR	0.8981	0.8835	0.699	0.8058	0.9175	0.84078
	HoeffdingTree	0.9078	0.8932	0.9223	0.8738	0.9029	0.9				HoeffdingTree	0.8786	0.8835	0.8544	0.8641	0.8592	0.86796
	DecisionTable	0.9369	0.9369	0.9417	0.9175	0.9417	0.93494				DecisionTable	0.8883	0.9029	0.9029	0.9029	0.9029	0.89998
	CSForest	0.9223	0.9175	0.932	0.8786	0.9272	0.91552				CSForest	0.8835	0.8835	0.8835	0.8786	0.8738	0.88058
	ADTree	0.9175	0.9223	0.9223	0.9078	0.9126	0.9165				ADTree	0.8932	0.8932	0.8689	0.8883	0.8786	0.88444
	Ridor	0.9223	0.932	0.9223	0.9175	0.9223	0.92328				Ridor	0.8738	0.8592	0.8592	0.8932	0.8932	0.87572
	Mean ACC	0.88543	0.89854	0.90045	0.88107	0.89804					Mean ACC	0.866	0.86796	0.83882	0.86018	0.87426
