# Supplementary material for: Improving Model Performance on the Stratification of Breast Cancer Patients by Integrating Multiscale Genomic Features
Source: Biomed Res Int. 2020 Aug 25;2020:1475368. doi: 10.1155/2020/1475368 (PMC7471833; doi:10.1155/2020/1475368)
Supplement: Supplementary 13 — Supplementary Table 9. The F1 scores achieved by different machine learning algorithms combined with different feature selection methods in BRCA. [file 1475368.f13.xlsx]

## Sheet: 30
30 features
mRNA		Feature Selection								miRNA		Feature Selection
		GainRatio	InfoGain	OneR	ReliefF	Fold Change	Mean F1					GainRatio	InfoGain	OneR	ReliefF	Fold Change	Mean F1
Ensemble Method	AdaBoostM1	0.8943	0.8943	0.8943	0.8661	0.8943	0.88866			Ensemble Method	AdaBoostM1	0.6721	0.8321	0.8804	0.8387	0.8567	0.816
	Dagging	0.8881	0.8863	0.9037	0.8778	0.9021	0.8916				Dagging	0.8102	0.8577	0.8387	0.8237	0.8188	0.82982
	LogitBoost	0.9053	0.8844	0.9069	0.8972	0.9069	0.90014				LogitBoost	0.8296	0.8444	0.8449	0.8325	0.8718	0.84464
	RandomCommittee	0.9069	0.9021	0.8926	0.8801	0.8943	0.8952				RandomCommittee	0.8678	0.8989	0.8654	0.866	0.8762	0.87486
	RandomForest	0.8972	0.9083	0.9147	0.8844	0.9069	0.9023				RandomForest	0.8782	0.9037	0.8953	0.8759	0.8953	0.88968
	RotationForest	0.9119	0.9021	0.9147	0.8926	0.9069	0.90564				RotationForest	0.874	0.8654	0.8782	0.8616	0.874	0.87064
	MultiClassClassifier	0.8869	0.8974	0.9021	0.8616	0.8888	0.88736				MultiClassClassifier	0.8323	0.8387	0.8387	0.8139	0.854	0.83552
	RandomSubSpace	0.8869	0.9069	0.9212	0.9037	0.9005	0.90384				RandomSubSpace	0.8512	0.8759	0.8935	0.8604	0.8759	0.87138
	Decorate	0.9053	0.8989	0.847	0.9021	0.8762	0.8859				Decorate	0.8654	0.8616	0.8567	0.8825	0.8825	0.86974
	MultiBoostAB	0.8943	0.8943	0.8943	0.8929	0.8943	0.89402				MultiBoostAB	0.7892	0.854	0.854	0.7892	0.8199	0.82126
	Mean F1	0.89771	0.8975	0.89915	0.88585	0.89712					Mean F1	0.827	0.86324	0.86458	0.84444	0.86251
Single Classifier	SimpleLogistic	0.874	0.8881	0.9005	0.9005	0.8907	0.89076			Single Classifier	SimpleLogistic	0.8387	0.863	0.8512	0.8102	0.8567	0.84396
	NaiveBayes	0.8323	0.8284	0.8382	0.8071	0.8548	0.83216				NaiveBayes	0.7869	0.8325	0.854	0.7015	0.8531	0.8056
	LibSVM	0.4356	0.4341	0.4356	0.4356	0.4356	0.4353				LibSVM	0.4325	0.4356	0.4356	0.4356	0.4356	0.43498
	LocalKnn	0.7694	0.9021	0.9021	0.8512	0.8139	0.84774				LocalKnn	0.7059	0.8024	0.7763	0.6346	0.8804	0.75992
	LibLINEAR	0.7476	0.7314	0.7623	0.573	0.8206	0.72698				LibLINEAR	0.8284	0.8126	0.8264	0.1997	0.6489	0.6632
	HoeffdingTree	0.8323	0.8284	0.8382	0.8604	0.8548	0.84282				HoeffdingTree	0.7907	0.8325	0.8478	0.7015	0.8531	0.80512
	DecisionTable	0.8907	0.8926	0.9069	0.8782	0.9053	0.89474				DecisionTable	0.8505	0.8579	0.8579	0.8237	0.8579	0.84958
	CSForest	0.8512	0.8419	0.8419	0.8643	0.8323	0.84632				CSForest	0.7416	0.798	0.7763	0.6986	0.7763	0.75816
	ADTree	0.8721	0.8701	0.9069	0.8943	0.9119	0.89106				ADTree	0.8179	0.8444	0.87	0.8114	0.8616	0.84106
	Ridor	0.8989	0.8762	0.8579	0.8914	0.8449	0.87386				Ridor	0.8163	0.8506	0.8762	0.8579	0.8411	0.84842
	Mean F1	0.80041	0.80933	0.81905	0.7956	0.81648					Mean F1	0.76094	0.79295	0.79717	0.66747	0.78647

## Sheet: 50
50 features
mRNA		Feature Selection								miRNA		Feature Selection
		GainRatio	InfoGain	OneR	ReliefF	Fold Change	Mean F1					GainRatio	InfoGain	OneR	ReliefF	Fold Change	Mean F1
Ensemble Method	AdaBoostM1	0.8943	0.8943	0.8943	0.8863	0.8943	0.8927			Ensemble Method	AdaBoostM1	0.826	0.8321	0.8114	0.8654	0.8387	0.83472
	Dagging	0.8844	0.8943	0.9083	0.8943	0.8943	0.89512				Dagging	0.8483	0.8419	0.826	0.8237	0.8294	0.83386
	LogitBoost	0.8907	0.8989	0.8989	0.9053	0.9069	0.90014				LogitBoost	0.8604	0.8478	0.8478	0.854	0.854	0.8528
	RandomCommittee	0.9083	0.9069	0.8881	0.8804	0.9133	0.8994				RandomCommittee	0.8678	0.8989	0.8907	0.8616	0.8678	0.87736
	RandomForest	0.9133	0.9069	0.9083	0.8888	0.9069	0.90484				RandomForest	0.8759	0.902	0.902	0.8759	0.8907	0.8893
	RotationForest	0.9147	0.8863	0.8943	0.8907	0.9005	0.8973				RotationForest	0.8782	0.8825	0.8888	0.826	0.8926	0.87362
	MultiClassClassifier	0.87	0.8838	0.9212	0.8639	0.8972	0.88722				MultiClassClassifier	0.8387	0.8512	0.8444	0.8355	0.8387	0.8417
	RandomSubSpace	0.9212	0.8943	0.9212	0.8888	0.8972	0.90454				RandomSubSpace	0.8759	0.8759	0.8869	0.8289	0.8419	0.8619
	Decorate	0.8721	0.8863	0.8801	0.8863	0.9005	0.88506				Decorate	0.8759	0.9037	0.8804	0.8654	0.9133	0.88774
	MultiBoostAB	0.8943	0.8943	0.8943	0.8944	0.8943	0.89432				MultiBoostAB	0.8387	0.8019	0.854	0.7892	0.8199	0.82074
	Mean F1	0.89633	0.89463	0.9009	0.88792	0.90054					Mean F1	0.85858	0.86379	0.86324	0.84256	0.8587
Single Classifier	SimpleLogistic	0.9053	0.866	0.8782	0.87	0.8989	0.88368			Single Classifier	SimpleLogistic	0.8449	0.863	0.8604	0.8567	0.8478	0.85456
	NaiveBayes	0.8449	0.8512	0.8567	0.8243	0.8584	0.8471				NaiveBayes	0.8179	0.8265	0.8387	0.7519	0.8718	0.82136
	LibSVM	0.4356	0.4356	0.4356	0.4356	0.4356	0.4356				LibSVM	0.4356	0.4356	0.4356	0.4356	0.4356	0.4356
	LocalKnn	0.7945	0.8838	0.8989	0.8126	0.8449	0.84694				LocalKnn	0.6583	0.8188	0.7237	0.678	0.8718	0.75012
	LibLINEAR	0.8601	0.8914	0.6753	0.7858	0.6082	0.76416				LibLINEAR	0.7703	0.8265	0.8208	0.6413	0.8264	0.77706
	HoeffdingTree	0.8325	0.8512	0.8567	0.8275	0.8584	0.84526				HoeffdingTree	0.8209	0.8265	0.8355	0.7519	0.8718	0.82132
	DecisionTable	0.8907	0.8863	0.9053	0.8782	0.9199	0.89608				DecisionTable	0.8579	0.8579	0.8579	0.7886	0.8579	0.84404
	CSForest	0.8512	0.8419	0.8419	0.8452	0.8512	0.84628				CSForest	0.7294	0.798	0.7873	0.6633	0.7763	0.75086
	ADTree	0.8801	0.876	0.9021	0.882	0.9037	0.88878				ADTree	0.8495	0.8542	0.8324	0.8294	0.8555	0.8442
	Ridor	0.8387	0.8505	0.8907	0.8102	0.9259	0.8632				Ridor	0.8601	0.8114	0.8654	0.8577	0.8394	0.8468
	Mean F1	0.81336	0.82339	0.81414	0.79714	0.81051					Mean F1	0.76448	0.79184	0.78577	0.72544	0.80543

## Sheet: 100
100 features
mRNA		Feature Selection								miRNA		Feature Selection
		GainRatio	InfoGain	OneR	ReliefF	Fold Change	Mean F1					GainRatio	InfoGain	OneR	ReliefF	Fold Change	Mean F1
Ensemble Method	AdaBoostM1	0.8943	0.8943	0.8863	0.8782	0.8943	0.88948			Ensemble Method	AdaBoostM1	0.809	0.8321	0.7907	0.826	0.8294	0.81744
	Dagging	0.8989	0.8907	0.8907	0.8863	0.8943	0.89218				Dagging	0.8289	0.8449	0.8086	0.8542	0.8289	0.8331
	LogitBoost	0.9069	0.8972	0.8907	0.874	0.9053	0.89482				LogitBoost	0.8387	0.8505	0.854	0.8478	0.8804	0.85428
	RandomCommittee	0.9005	0.8943	0.8881	0.8989	0.9069	0.89774				RandomCommittee	0.8972	0.8616	0.8718	0.8266	0.8888	0.8692
	RandomForest	0.9037	0.8926	0.9069	0.8825	0.9199	0.90112				RandomForest	0.8848	0.8848	0.8935	0.8483	0.8935	0.88098
	RotationForest	0.9053	0.8989	0.9199	0.874	0.8989	0.8994				RotationForest	0.8869	0.8694	0.8505	0.8449	0.8762	0.86558
	MultiClassClassifier	0.8096	0.882	0.8555	0.8179	0.7943	0.83186				MultiClassClassifier	0.8567	0.8444	0.8592	0.7963	0.8121	0.83374
	RandomSubSpace	0.8943	0.8943	0.9005	0.9069	0.9199	0.90318				RandomSubSpace	0.8759	0.8848	0.8694	0.8669	0.8669	0.87278
	Decorate	0.9069	0.8989	0.9133	0.8907	0.9133	0.90462				Decorate	0.8848	0.863	0.8848	0.8654	0.8825	0.8761
	MultiBoostAB	0.8943	0.8943	0.8943	0.8944	0.8943	0.89432				MultiBoostAB	0.854	0.8567	0.8019	0.8484	0.8449	0.84118
	Mean F1	0.89147	0.89375	0.89462	0.88038	0.89414					Mean F1	0.86169	0.85922	0.84844	0.84248	0.86036
Single Classifier	SimpleLogistic	0.9053	0.8953	0.8972	0.8616	0.8804	0.88796			Single Classifier	SimpleLogistic	0.8759	0.8604	0.8387	0.874	0.8825	0.8663
	NaiveBayes	0.8531	0.8548	0.8701	0.8652	0.8623	0.8611				NaiveBayes	0.8072	0.8384	0.8126	0.7775	0.87	0.82114
	LibSVM	0.4356	0.4356	0.4356	0.4356	0.4356	0.4356				LibSVM	0.4356	0.4356	0.4356	0.4356	0.4356	0.4356
	LocalKnn	0.8325	0.8959	0.8844	0.8163	0.8419	0.8542				LocalKnn	0.6932	0.8024	0.6803	0.6074	0.8694	0.73054
	LibLINEAR	0.7223	0.5347	0.8741	0.8294	0.7685	0.7458				LibLINEAR	0.6825	0.6388	0.6825	0.4557	0.6234	0.61658
	HoeffdingTree	0.8411	0.8548	0.8642	0.8652	0.8567	0.8564				HoeffdingTree	0.8205	0.8152	0.8153	0.7724	0.87	0.81868
	DecisionTable	0.8801	0.8427	0.9053	0.87	0.9133	0.88228				DecisionTable	0.8579	0.8579	0.8579	0.8296	0.8579	0.85224
	CSForest	0.8512	0.8512	0.8953	0.8387	0.8694	0.86116				CSForest	0.8086	0.8289	0.7873	0.7416	0.8289	0.79906
	ADTree	0.8782	0.8694	0.8943	0.8838	0.902	0.88554				ADTree	0.8296	0.847	0.8265	0.8403	0.8616	0.841
	Ridor	0.8907	0.8639	0.8907	0.8139	0.8907	0.86998				Ridor	0.7916	0.8416	0.8079	0.8387	0.8622	0.8284
	Mean F1	0.80901	0.78983	0.84112	0.80797	0.82208					Mean F1	0.76026	0.77662	0.75446	0.71728	0.79615

## Sheet: 200
200 features
mRNA		Feature Selection								miRNA		Feature Selection
		GainRatio	InfoGain	OneR	ReliefF	Fold Change	Mean F1					GainRatio	InfoGain	OneR	ReliefF	Fold Change	Mean F1
Ensemble Method	AdaBoostM1	0.8943	0.8943	0.8943	0.8531	0.8943	0.88606			Ensemble Method	AdaBoostM1	0.7963	0.7851	0.802	0.8555	0.7963	0.80704
	Dagging	0.8926	0.8943	0.8972	0.8989	0.8881	0.89422				Dagging	0.8512	0.8483	0.8387	0.8403	0.8577	0.84724
	LogitBoost	0.9053	0.8989	0.8989	0.8437	0.9199	0.89334				LogitBoost	0.854	0.8678	0.8478	0.8294	0.8444	0.84868
	RandomCommittee	0.8907	0.9005	0.8943	0.8907	0.8943	0.8941				RandomCommittee	0.8972	0.8989	0.8848	0.874	0.8869	0.88836
	RandomForest	0.9053	0.9083	0.9147	0.8825	0.8989	0.90194				RandomForest	0.8694	0.8782	0.8694	0.8483	0.8759	0.86824
	RotationForest	0.9147	0.9005	0.8863	0.8907	0.9069	0.89982				RotationForest	0.8935	0.8804	0.8848	0.8604	0.854	0.87462
	MultiClassClassifier	0.7258	0.7088	0.7441	0.7887	0.7346	0.7404				MultiClassClassifier	0.7761	0.7955	0.6743	0.718	0.7428	0.74134
	RandomSubSpace	0.9147	0.9212	0.9212	0.9133	0.9147	0.91702				RandomSubSpace	0.8759	0.8604	0.8759	0.8356	0.8669	0.86294
	Decorate	0.9119	0.9133	0.8907	0.8926	0.8907	0.89984				Decorate	0.8782	0.8935	0.8355	0.8694	0.8848	0.87228
	MultiBoostAB	0.8943	0.8943	0.8943	0.8741	0.8943	0.89026				MultiBoostAB	0.8567	0.8567	0.8567	0.8721	0.8567	0.85978
	Mean F1	0.88496	0.88344	0.8836	0.87283	0.88367					Mean F1	0.85485	0.85648	0.83699	0.8403	0.84664
Single Classifier	SimpleLogistic	0.854	0.9147	0.8804	0.8265	0.8888	0.87288			Single Classifier	SimpleLogistic	0.8694	0.8449	0.8604	0.8233	0.8782	0.85524
	NaiveBayes	0.8531	0.8492	0.8721	0.8354	0.868	0.85556				NaiveBayes	0.8427	0.8403	0.7967	0.7939	0.8411	0.82294
	LibSVM	0.4356	0.4356	0.4356	0.4356	0.4356	0.4356				LibSVM	0.4356	0.4356	0.4356	0.4356	0.4356	0.4356
	LocalKnn	0.7128	0.9147	0.8762	0.8449	0.8972	0.84916				LocalKnn	0.5345	0.7416	0.5189	0.5909	0.8024	0.63766
	LibLINEAR	0.7879	0.8416	0.7963	0.7302	0.7791	0.78702				LibLINEAR	0.8604	0.8782	0.8315	0.5363	0.7694	0.77516
	HoeffdingTree	0.8531	0.8492	0.8601	0.8212	0.8623	0.84918				HoeffdingTree	0.8152	0.8484	0.7841	0.7836	0.8321	0.81268
	DecisionTable	0.8461	0.9119	0.9053	0.8782	0.9021	0.88872				DecisionTable	0.8579	0.8579	0.8579	0.8825	0.8579	0.86282
	CSForest	0.8512	0.8512	0.8953	0.8188	0.8604	0.85538				CSForest	0.8086	0.798	0.8086	0.765	0.8086	0.79776
	ADTree	0.8801	0.8953	0.8953	0.8898	0.9133	0.89476				ADTree	0.8592	0.8237	0.8555	0.8718	0.8567	0.85338
	Ridor	0.8694	0.8701	0.8953	0.8483	0.8678	0.87018				Ridor	0.8898	0.8542	0.8567	0.7772	0.8356	0.8427
	Mean F1	0.79433	0.83335	0.83119	0.79289	0.82746					Mean F1	0.77733	0.79228	0.76059	0.72601	0.79176

## Sheet: 300
300 features
mRNA		Feature Selection								miRNA		Feature Selection
		GainRatio	InfoGain	OneR	ReliefF	Fold Change	Mean F1					GainRatio	InfoGain	OneR	ReliefF	Fold Change	Mean F1
Ensemble Method	AdaBoostM1	0.8943	0.8943	0.8943	0.8801	0.8943	0.89146			Ensemble Method	AdaBoostM1	0.7851	0.7999	0.8352	0.8206	0.7963	0.80742
	Dagging	0.9133	0.8943	0.8782	0.8762	0.8844	0.88928				Dagging	0.8577	0.8512	0.8483	0.8356	0.8577	0.8501
	LogitBoost	0.932	0.9369	0.9417	0.9078	0.9199	0.92766				LogitBoost	0.854	0.8387	0.8387	0.8387	0.8444	0.8429
	RandomCommittee	0.9069	0.8989	0.9021	0.9069	0.8959	0.90214				RandomCommittee	0.8419	0.8639	0.8907	0.8654	0.863	0.86498
	RandomForest	0.8989	0.9083	0.9069	0.9037	0.9069	0.90494				RandomForest	0.8953	0.8953	0.8759	0.8323	0.8848	0.87672
	RotationForest	0.8907	0.9147	0.9069	0.8741	0.9021	0.8977				RotationForest	0.8848	0.8907	0.8848	0.863	0.8694	0.87854
	MultiClassClassifier	0.7201	0.6812	0.673	0.7292	0.6743	0.69556				MultiClassClassifier	0.7492	0.6831	0.7153	0.6653	0.7492	0.71242
	RandomSubSpace	0.9069	0.9053	0.8863	0.9069	0.9133	0.90374				RandomSubSpace	0.8782	0.8869	0.8848	0.8869	0.8577	0.8789
	Decorate	0.8943	0.9083	0.9083	0.8907	0.9133	0.90298				Decorate	0.8616	0.8972	0.854	0.902	0.8694	0.87684
	MultiBoostAB	0.8943	0.8943	0.8943	0.8741	0.8943	0.89026				MultiBoostAB	0.8567	0.8567	0.8567	0.7992	0.8654	0.84694
	Mean F1	0.88517	0.88365	0.8792	0.87497	0.87987					Mean F1	0.84645	0.84636	0.84844	0.8309	0.84573
Single Classifier	SimpleLogistic	0.8972	0.9147	0.8972	0.8355	0.8888	0.88668			Single Classifier	SimpleLogistic	0.8782	0.8759	0.8869	0.8604	0.9037	0.88102
	NaiveBayes	0.87	0.8641	0.87	0.818	0.868	0.85802				NaiveBayes	0.8315	0.8484	0.8315	0.7967	0.8045	0.82252
	LibSVM	0.4356	0.4356	0.4356	0.4356	0.4356	0.4356				LibSVM	0.4356	0.4356	0.4356	0.4356	0.4356	0.4356
	LocalKnn	0.7294	0.8907	0.8825	0.8387	0.8869	0.84564				LocalKnn	0.5189	0.7113	0.5189	0.6074	0.765	0.6243
	LibLINEAR	0.6774	0.6496	0.7796	0.7827	0.791	0.73606				LibLINEAR	0.5525	0.8361	0.8387	0.8719	0.7981	0.77946
	HoeffdingTree	0.8616	0.8641	0.87	0.8232	0.8567	0.85512				HoeffdingTree	0.8152	0.8371	0.8019	0.7814	0.8045	0.80802
	DecisionTable	0.8461	0.9119	0.9053	0.8782	0.9053	0.88936				DecisionTable	0.8208	0.8579	0.8579	0.8416	0.8579	0.84722
	CSForest	0.8694	0.8953	0.8782	0.8086	0.8512	0.86054				CSForest	0.8188	0.8086	0.8086	0.7763	0.8188	0.80622
	ADTree	0.8881	0.9133	0.8914	0.8701	0.876	0.88778				ADTree	0.8206	0.8041	0.8179	0.8352	0.8384	0.82324
	Ridor	0.8694	0.8953	0.8898	0.866	0.9005	0.8842				Ridor	0.8099	0.8579	0.8567	0.7591	0.8294	0.8226
	Mean F1	0.79442	0.82346	0.82996	0.79566	0.826					Mean F1	0.7302	0.78729	0.76546	0.75656	0.78559

## Sheet: 500
500 features
mRNA		Feature Selection								miRNA		Feature Selection
		GainRatio	InfoGain	OneR	ReliefF	Fold Change	Mean F1					GainRatio	InfoGain	OneR	ReliefF	Fold Change	Mean F1
Ensemble Method	AdaBoostM1	0.8943	0.8943	0.9069	0.8782	0.8943	0.8936			Ensemble Method	AdaBoostM1	0.8324	0.8324	0.7922	0.7963	0.7963	0.80992
	Dagging	0.8907	0.8863	0.8718	0.8762	0.8972	0.88444				Dagging	0.8323	0.8694	0.8669	0.8289	0.8086	0.84122
	LogitBoost	0.9053	0.9199	0.9053	0.8762	0.8989	0.90112				LogitBoost	0.8387	0.8294	0.8449	0.8416	0.8444	0.8398
	RandomCommittee	0.874	0.8881	0.8926	0.8989	0.9021	0.89114				RandomCommittee	0.874	0.8718	0.863	0.8907	0.8616	0.87222
	RandomForest	0.9053	0.8989	0.8844	0.8888	0.9133	0.89814				RandomForest	0.8935	0.8935	0.8669	0.854	0.854	0.87238
	RotationForest	0.9005	0.9083	0.9005	0.8825	0.8989	0.89814				RotationForest	0.8718	0.8718	0.8782	0.874	0.8953	0.87822
	MultiClassClassifier	0.6827	0.5983	0.6921	0.7342	0.6435	0.67016				MultiClassClassifier	0.7371	0.711	0.6524	0.6997	0.6435	0.68874
	RandomSubSpace	0.9005	0.8943	0.9005	0.8972	0.9133	0.90116				RandomSubSpace	0.8869	0.8694	0.8848	0.8694	0.8759	0.87728
	Decorate	0.8888	0.9069	0.9069	0.8989	0.8907	0.89844				Decorate	0.9037	0.8759	0.8825	0.8888	0.8888	0.88794
	MultiBoostAB	0.8943	0.8943	0.8943	0.8741	0.8943	0.89026				MultiBoostAB	0.8567	0.8567	0.8567	0.8654	0.8654	0.86018
	Mean F1	0.87364	0.86896	0.87553	0.87052	0.87465					Mean F1	0.85271	0.84813	0.83885	0.84088	0.83338
Single Classifier	SimpleLogistic	0.8324	0.9147	0.8972	0.8555	0.9037	0.8807			Single Classifier	SimpleLogistic	0.8126	0.8483	0.8325	0.8604	0.8782	0.8464
	NaiveBayes	0.8782	0.8623	0.8825	0.8336	0.8778	0.86688				NaiveBayes	0.8471	0.8604	0.8253	0.826	0.8126	0.83428
	LibSVM	0.4356	0.4356	0.4356	0.4356	0.4356	0.4356				LibSVM	0.4356	0.4356	0.4356	0.4356	0.4356	0.4356
	LocalKnn	0.7476	0.8888	0.8604	0.8387	0.8848	0.84406				LocalKnn	0.5378	0.5378	0.4993	0.5909	0.7416	0.58148
	LibLINEAR	0.7206	0.7858	0.7308	0.8208	0.7441	0.76042				LibLINEAR	0.8564	0.8024	0.6768	0.7734	0.874	0.7966
	HoeffdingTree	0.8639	0.8567	0.8825	0.8388	0.8661	0.8616				HoeffdingTree	0.8361	0.8437	0.8095	0.8152	0.8072	0.82234
	DecisionTable	0.9053	0.9053	0.9133	0.8782	0.9133	0.90308				DecisionTable	0.8378	0.8579	0.8579	0.8579	0.8579	0.85388
	CSForest	0.8782	0.8694	0.8953	0.7873	0.8869	0.86342				CSForest	0.798	0.798	0.798	0.7873	0.7763	0.79152
	ADTree	0.882	0.8914	0.8914	0.8737	0.8741	0.88252				ADTree	0.8355	0.8355	0.8065	0.8378	0.8209	0.82724
	Ridor	0.8898	0.8972	0.8898	0.874	0.8825	0.88666				Ridor	0.7945	0.7772	0.7772	0.8188	0.8294	0.79942
	Mean F1	0.80336	0.83072	0.82788	0.80362	0.82689					Mean F1	0.75914	0.75968	0.73186	0.76033	0.78337
